# Supplementary material for: A dewetting route to grow heterostructured nanoparticles based on thin film heterojunctions
Source: Royal Society of Chemistry journal article supplement (doi:10.1039/c5nr07016c), 2015-01-01
Supplement: c5nr07016c1.pdf [file c5nr07016c1.pdf]

## Supplementary Information for

# Dewetting Route to Grow Heterostructured Nanoparticles Based on Thin Film Heterojunctions

Junjie Li,<sup>1,2</sup> Deqiang Yin,<sup>3</sup> Qiang Li,<sup>4</sup> Chunlin Chen,<sup>2</sup> Sumei Huang,<sup>1</sup> and Zhongchang  
Wang<sup>2</sup>,

*<sup>1</sup>Engineering Research Center for Nanophotonics and Advanced Instrument, Ministry  
of Education, Department of Physics, East China Normal University, North  
Zhongshan Road 3663, Shanghai 200062, China*

*<sup>2</sup>Advanced Institute for Materials Research, Tohoku University, 2-1-1 Katahira,  
Aoba-ku, Sendai 980-8577, Japan*

*<sup>3</sup>School of Manufacturing Science and Engineering, Sichuan University, Chengdu  
610064, China*

*<sup>4</sup>School of Materials Science and Engineering, University of Shanghai for Science  
and Technology, Shanghai 200093, China*

### Supplementary Table S1

**Table S1** Experimental details of the prepared samples with different thickness of the metal heterojunction.

| Sample | Deposition Rate |           | Deposition Time |        | Thickness |         |            |
|--------|-----------------|-----------|-----------------|--------|-----------|---------|------------|
|        | Co (nm/s)       | Au (nm/s) | Co (s)          | Au (s) | Co (nm)   | Au (nm) | Total (nm) |
| 1      | 0.10            | 0.12      | 50              | 42     | 5.1       | 5.0     | 10.1       |
| 2      | 0.11            | 0.13      | 64              | 54     | 7.0       | 7.1     | 14.1       |
| 3      | 0.10            | 0.12      | 90              | 70     | 9.0       | 9.0     | 18.0       |
| 4      | 0.12            | 0.11      | 92              | 100    | 11.1      | 11.0    | 22.1       |

## Supplementary Table S2

**Table S2** EDS analysis of an Au bell.

| Element | Series   | [wt.%]  |
|---------|----------|---------|
| Cobalt  | K-series | 0.45811 |
| Gold    | L-series | 99.5418 |
| Sum     |          | 100     |

### Supplementary Table S3

**Table S2** EDS analysis of a Co bell.

| Element | Series   | [wt.%]   |
|---------|----------|----------|
| Cobalt  | K-series | 84.44802 |
| Gold    | L-series | 15.55198 |
| Sum     |          | 100      |

## Supplementary Figure S1

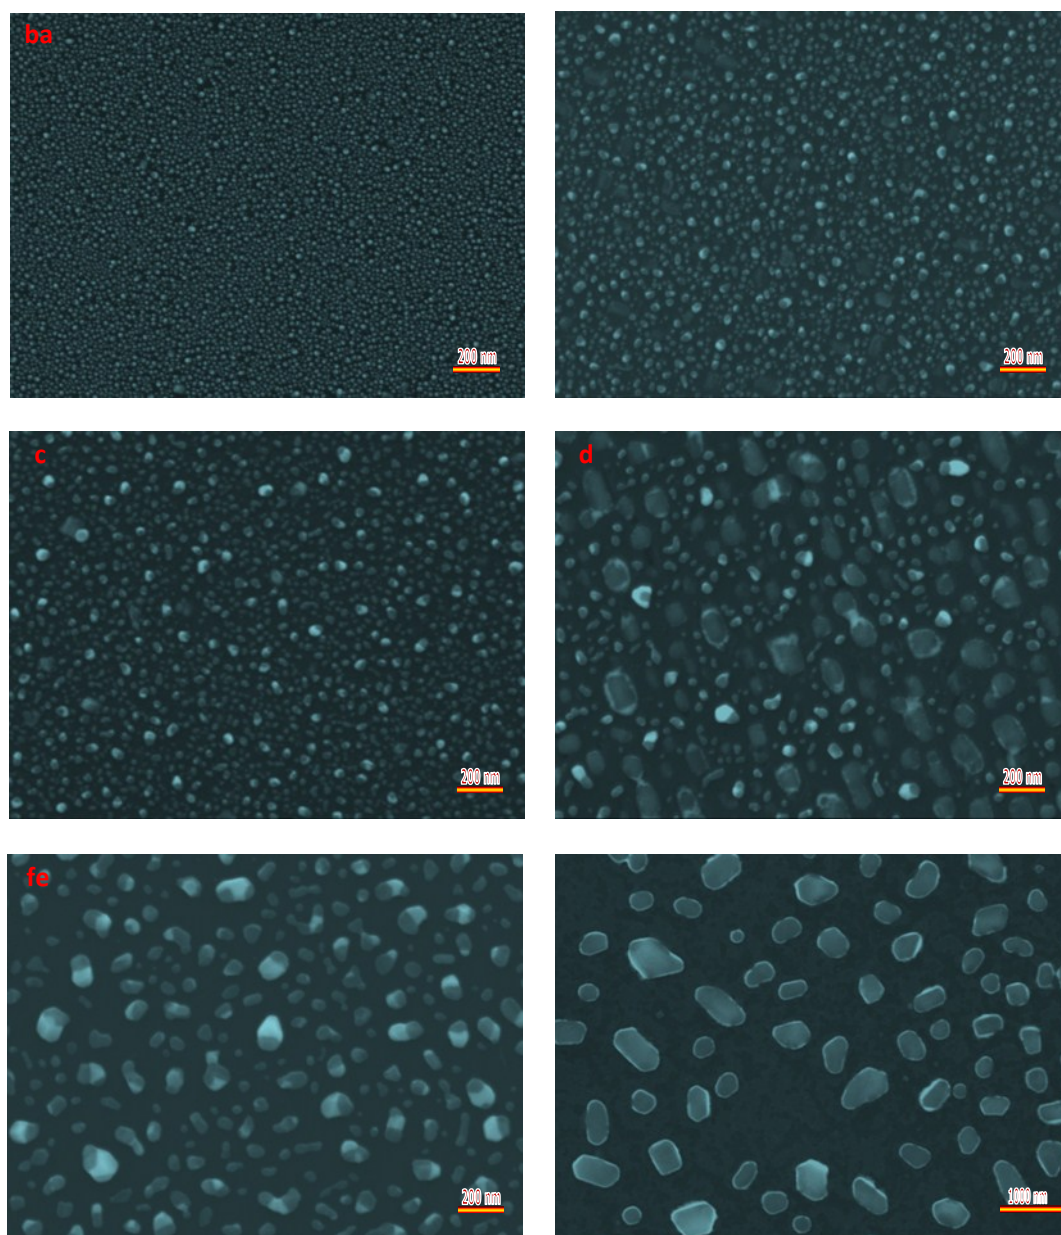

**Figure S1** Shape transformation of Co-Au nanoparticles from dumbbells to core-shell. **a–c**, SEM images of the sample 1 annealed at 1073 K for 1 min (**a**), 30 min (**b**), and 60 min (**c**). **d–f**, SEM images of the sample 2 (**d**), 3 (**e**), and 4 (**f**) annealed at 1073 K for 60 min.

## Supplementary Figure S2

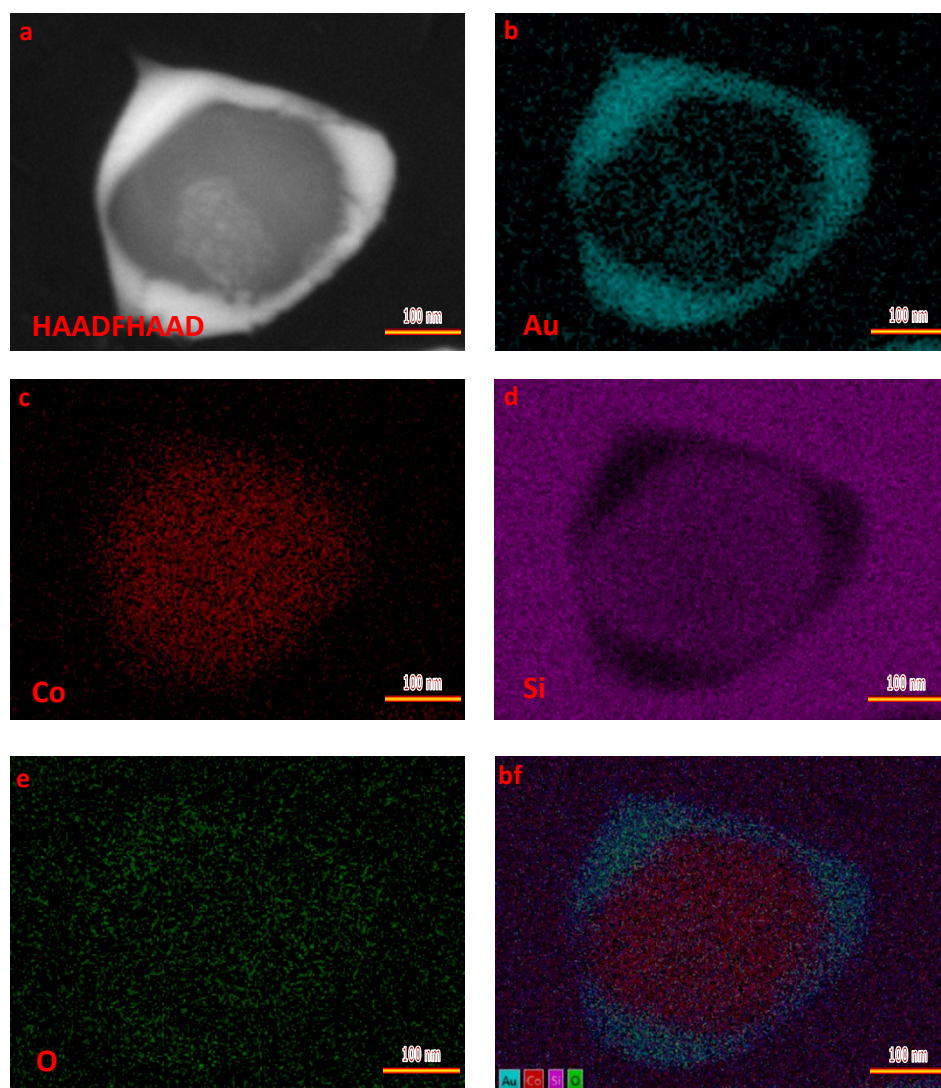

**Figure S2** EDS mapping of an individual Co-Au core-shell nanoparticle. **a**, Enlarged SEM image of a Co-Au core-shell nanoparticle. **b–f**, The Au, Co, Si, O, and their combined EDS mapping of the core-shell nanoparticle.

### Supplementary Figure S3

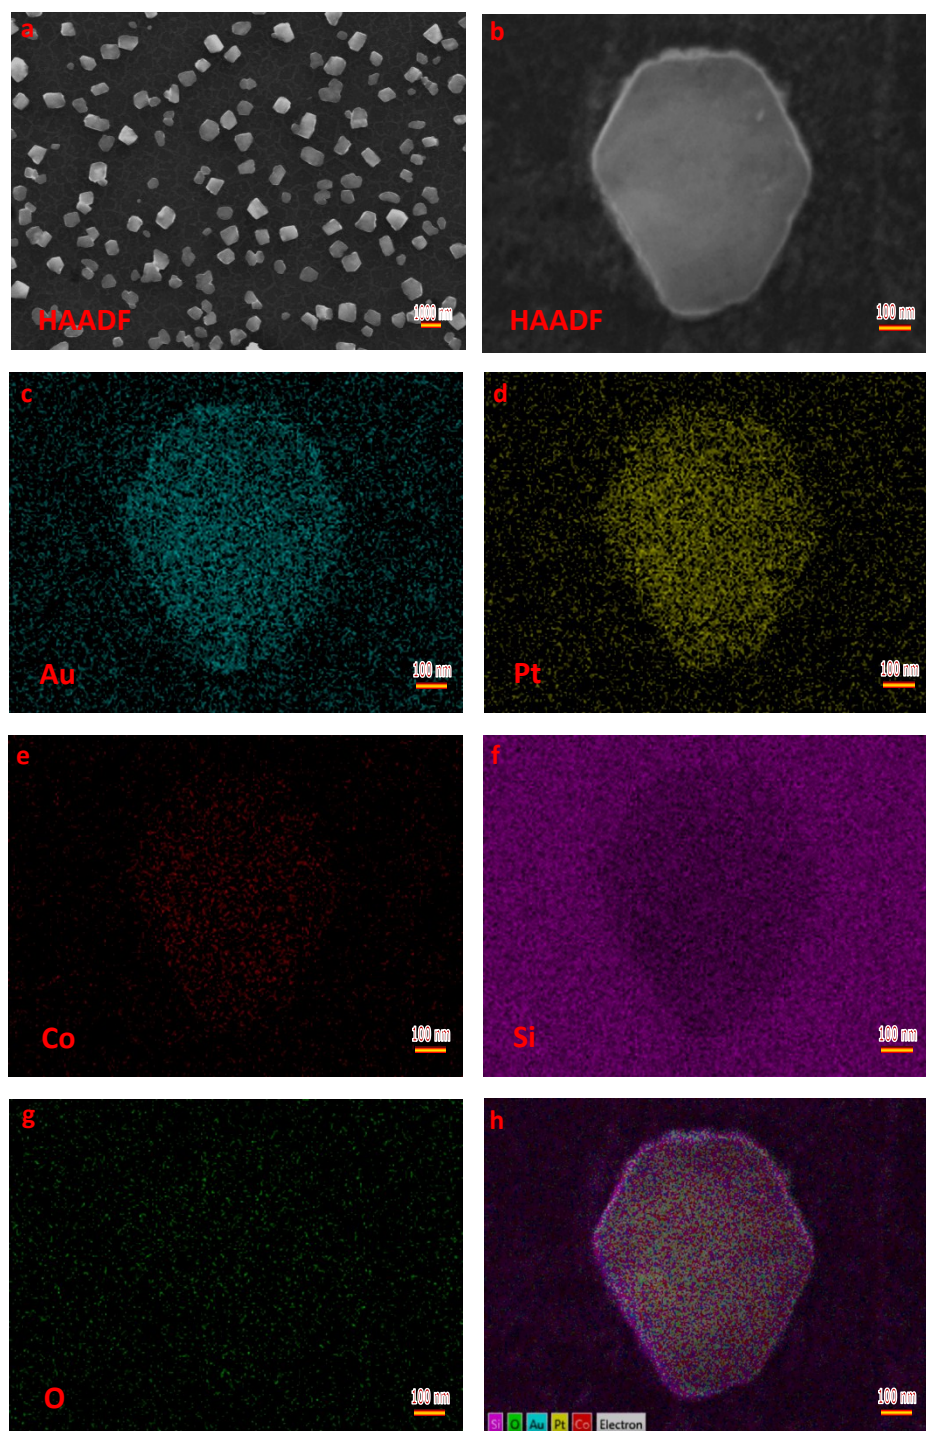

**Figure S3** Morphology and composition of CoPt-Au core-shell nanoparticles. **a**, A typical SEM image of CoPt-Au core-shell nanoparticles. **b**, An enlarged SEM image of a CoPt-Au core-shell nanoparticle. **c-f**, The Au, Pt, Co, Si, O, and their combined

EDS mapping of the core-shell nanoparticle. The CoPt-Au core-shell nanoparticles were fabricated by annealing Si/Pt(15.0 nm)/Co(5.1 nm)/Au(20.0 nm) heterojunction at 1073 K for 60 min in vacuum.



### Supplementary Figure S4

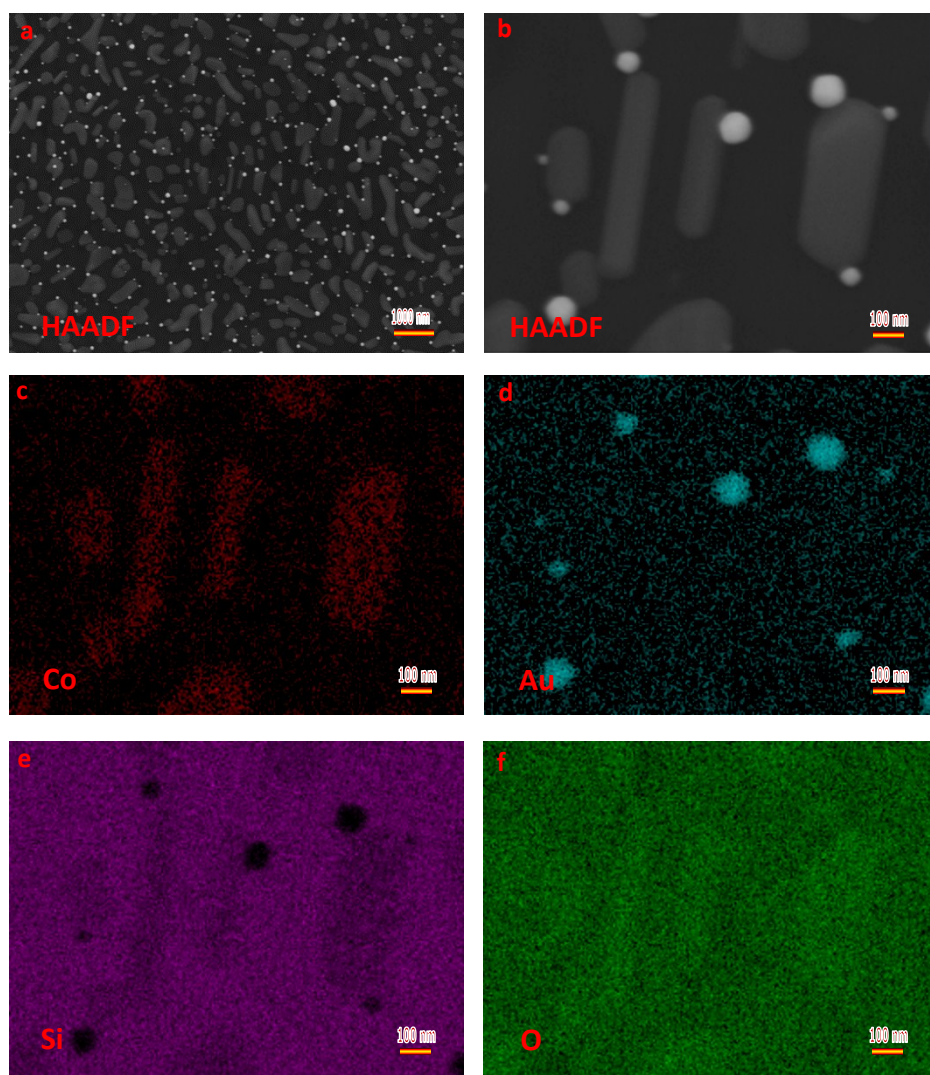

**Figure S4** Morphology and composition of CoO-Au heterostructured nanoparticles. **a**, A typical SEM image of CoO-Au heterostructured nanoparticles. **b**, An enlarged SEM image of the CoO-Au heterostructured nanoparticles. **c–f**, The Co, Au, Si, and O EDS mapping of the heterostructured nanoparticles. The CoO-Au nanoparticles were fabricated by annealing Si/Co(11.1 nm)/Au(11.0 nm) heterojunction at 1273 K for 60 min in air.

### Supplementary Figure S5

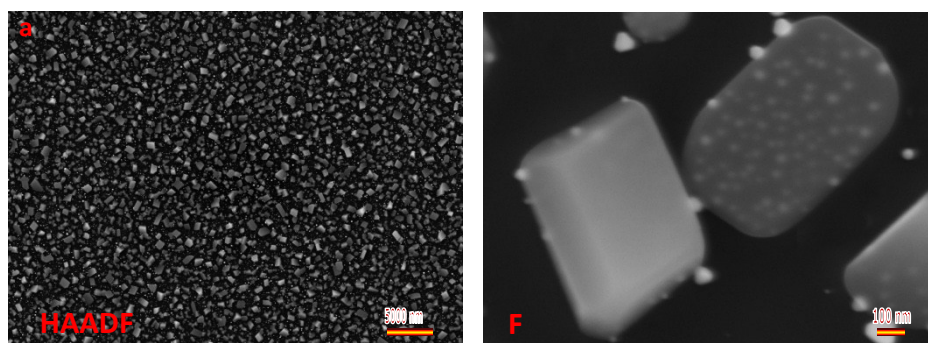

**Figure S5** Morphology of MgO-Pt heterostructured nanoparticles. **a**, A typical SEM image of the MgO-Pt heterostructured nanoparticles. **b**, Enlarged SEM image of the MgO-Pt heterostructured nanoparticles. The MgO-Pt heterostructured nanoparticles were fabricated by annealing Si/MgO(20.1 nm)/Pt(10.0 nm) heterojunction at 1273 K for 60 min in air.
